# Supplementary material for: The COPD-SIB: a newly developed disease-specific item bank to measure health-related quality of life in patients with chronic obstructive pulmonary disease
Source: Springer Nature journal article supplement (doi:10.1186/s12955-016-0500-0), 2016-06-27
Supplement: MOESM3 [file 10289418]

### Supplement 3: Collapsing response categories

Response categories were collapsed in a two-step procedure. In the first step response categories were assigned a one-to-one mapping to a new set of response categories, based on the number of endorsements for each response category. The following R code was used for this purpose;

```
# Create Mapping
# takes a matrix (or any 2d object) and collapses categories to where each
# category has at least threshold responses.
# rather naïve, will collapse to 1 category without warning if data requires.
#
# returns a list of (named) lists, each with two elements - the old and new
# response category indices.
# these can easily be used to recode, for example with recode() from the "car"
# package.
#
# Author: Karel A. Kroeze <k.a.kroeze@utwente.nl>

# Start from the right, and collapse to the left whenever count < threshold
# Finally, collapse once more if first element is also too low.
create_mapping <- function(data, threshold) {
  counts <- list()
  for (i in 1:ncol(data)) {
    counts[[i]] <- table(factor(data[,i], levels = 1:5))
  }

  lapply(counts, function(count) {
    # number of response categories, k
    k <- length(count)
    # set up mapping lists
    old <- as.numeric(names(count))
    new <- 1:k-1
    # note that the count variable is only used as a temporary bookkeeping
    # mechanism, old and new form the actual mapping.

    # loop over response cats, right to left up to second element.
    for (i in k:2){
      # if category is too low, add it to the left.
      if (count[i] < threshold){
        # update count for next step
        count[i-1] <- count[i-1] + count[i]
        count[i] <- 0

        # update new mapping
        new[i:k] <- new[i:k] - 1
      }
    }

    # first element
    if (count[1] < threshold){
      # sum first elements until threshold is reached
```

```

    for (i in 1:k) {
      if (sum(count[1:i]) >= threshold) break
    }

    # set counts
    count[i] <- sum(count[1:i])
    count[-(i:k)] <- 0

    # set new
    new[1:i] <- new[i+1] - 1
  }

  # start at zero
  new = new - min(new, na.rm = TRUE)

  if(length(unique(new)) == 1) warning("Only one response category left
after recoding.")

  list(old = old, new = new)
})
}

```

In pseudo code, the steps are the following;

- 1) Convert response data into category counts
- 2) Starting from the highest response category, if the count is smaller than the threshold, collapse the category into the next lower category.
- 3) Repeat until the second-lowest category is reached.
- 4) If the count in the lowest category is smaller than the threshold, collapse the category into the next higher categories, until the threshold count is reached.
- 5) Finally, set the new mapping to start at zero.

The result is a list of mappings, one for each item. The actual recode is performed in a second step, with the aid of the `recode()` function from R package `car` (Fox & Weisberg, 2011).

## References

Fox, J. and Weisberg, S. (2011) *An R Companion to Applied Regression*, Second Edition, Sage.
