# Supplementary material for: The COPD-SIB: a newly developed disease-specific item bank to measure health-related quality of life in patients with chronic obstructive pulmonary disease
Source: Springer Nature journal article supplement (doi:10.1186/s12955-016-0500-0), 2016-06-27
Supplement: MOESM4 [file 10289418]

**Supplement 4** Calibration results of the final version of the COPD-SIB item bank

**Table S4** GRM estimates for the shortened (final) version of the COPD-SIB

| Item nr | Theme | $\hat{\alpha}$ | $\hat{\beta}_1$ | $\hat{\beta}_2$ | $\hat{\beta}_3$ | $\hat{\beta}_4$ |
|---------|-------|----------------|-----------------|-----------------|-----------------|-----------------|
| 1       | 5     | 1.1            | -2.54           | -1.03           | 0.29            |                 |
| 2       | 5     | 1.18           | -3.02           | -0.9            | 0.31            | 1.51            |
| 3       | 5     | 1.45           | -2.03           | -0.26           | 0.71            | 1.82            |
| 4       | 5     | 1.47           | -2.22           | -0.3            | 0.77            | 1.61            |
| 5       | 5     | 1.25           | -2.07           | -0.37           | 0.62            | 1.88            |
| 9       | 8     | 1.76           | -1.03           | 0.84            | 1.39            | 2.34            |
| 14      | 3     | 1.71           | -2.47           | -0.81           | 0.17            | 1.35            |
| 15      | 1     | 1.23           | -2.23           | 0.02            | 0.94            | 2.68            |
| 17      | 2     | 1.49           | -1.04           | 0.76            | 1.5             | 2.34            |
| 18      | 3     | 1.34           | -2.66           | -1.53           | -0.36           | 1.18            |
| 20      | 1     | 1.42           | -2              | -0.4            | 0.64            | 2.36            |
| 21      | 3     | 1.89           | -1.55           | -0.41           | 0.69            |                 |
| 22      | 1     | 1.1            | -0.99           | -0.02           | 1.87            |                 |
| 23      | 1     | 2.26           | -1.06           | 0.51            | 1.18            | 1.89            |
| 25      | 1     | 1.48           | -2.22           | 0.15            | 0.82            | 2.18            |
| 27      | 3     | 1.98           | -2.14           | -0.84           | -0.12           | 1.11            |
| 28      | 1     | 1.63           | -1.29           | 0.58            | 1.32            | 2.41            |
| 29      | 2     | 2.1            | -2.1            | -0.43           | 0.02            | 1.18            |
| 30      | 8     | 1.74           | -2.3            | -0.63           | -0.05           | 1.21            |
| 32      | 8     | 1.95           | -2.02           | -0.73           | -0.17           | 0.93            |
| 33      | 8     | 1.76           | -2.05           | -0.73           | -0.12           | 1.16            |
| 34      | 8     | 1.78           | -1.34           | -0.61           | 0.91            |                 |
| 35      | 8     | 1.36           | -1.68           | -0.48           | 1.03            |                 |
| 36      | 8     | 1.72           | -1.78           | -0.02           | 0.62            | 1.48            |
| 37      | 8     | 1.56           | -0.52           | 0.22            | 1.62            |                 |
| 38      | 8     | 1.53           | -1.84           | 0.08            | 0.72            | 1.89            |
| 39      | 8     | 1.44           | -2.6            | -0.73           | 0.1             | 1.55            |
| 40      | 8     | 2.02           | -1.12           | 0.97            | 1.43            |                 |
| 41      | 8     | 1.14           | -3.28           | -1.16           | -0.16           | 1.91            |
| 42      | 8     | 2.05           | -2.16           | -0.85           | -0.15           | 1.19            |
| 43      | 8     | 2.59           | -1.8            | -0.61           | 0.03            | 1.14            |
| 44      | 8     | 1.63           | -1.39           | -0.37           | 1.61            |                 |
| 45      | 8     | 2.25           | -1.76           | -0.28           | 0.3             | 1.28            |
| 46      | 8     | 2.29           | -1.94           | -0.54           | 0.16            | 1.51            |
| 47      | 7     | 2.45           | -1.09           | 0.13            | 0.63            | 1.63            |

|           |   |      |       |       |       |      |
|-----------|---|------|-------|-------|-------|------|
| <b>48</b> | 7 | 1.53 | -0.8  | 0.93  | 1.55  |      |
| <b>49</b> | 7 | 2.25 | -0.83 | 0.37  | 0.82  | 1.78 |
| <b>50</b> | 1 | 2.28 | -2.01 | -0.68 | 0.46  | 1.18 |
| <b>51</b> | 3 | 1.76 | -2.35 | -1.32 | -0.62 |      |
| <b>52</b> | 1 | 1.41 | -2.06 | -0.91 | 0.01  |      |
| <b>55</b> | 3 | 1.93 | -2.02 | -0.84 | 0.26  |      |
| <b>56</b> | 1 | 1.12 | -3    | -1.04 | 0.95  |      |
| <b>57</b> | 1 | 1.35 | -1.04 | 0.77  |       |      |
| <b>60</b> | 6 | 1.89 | -1.58 | -0.2  | 1.6   |      |
| <b>62</b> | 7 | 2.35 | -1.43 | -0.62 | 0.1   | 0.65 |
| <b>63</b> | 7 | 2.56 | -2.02 | -1.22 | -0.18 | 0.47 |

Theme: 1 = Coping with disease/symptoms, adaptability; 2 = Autonomy; 3 = Anxiety about the course/end-state of the disease, hopelessness; 4 = Positive psychological functioning; 5 = Situations triggering or enhancing breathing problems; 6 = Symptoms; 7 = Activity; 8 = Impact
